# Supplementary material for: Clinical, endoscopic, and histologic characteristics of lymphocytic esophagitis: a systematic review
Source: Springer Nature journal article supplement (doi:10.1007/s10388-018-0649-1), 2018-10-29
Supplement: MOESM1 [file 16234192]

**ELECTRONIC SUPPLEMENTS**

**Electronic Supplement 1:** Complete Search Strategy

One author (MH) searched for studies related to LyE in January 2018 on the Ovid Medline, Embase, and Scopus databases. All citations related to the indexed words “lymphocytosis AND esophagitis,” as well as the keyword/text lymphocyt* occurring within two words of esophag* or oesophag*” were searched. The primary inclusion criterion was the use of histologic criteria to define LyE. Exclusion criteria included the following: non-primary data (i.e. reviews, commentaries); non-human data; and no available texts/abstracts.

A total of 412 citations (89 from Medline; 196 from Embase; 127 from Scopus) were screened independently by the authors.

Database: Embase Classic+Embase <1947 to 2018 January 22>

Search Strategy:

--------------------------------------------------------------------------------

1 (Lymphocyt* adj2 (esophag* or oesophag*)).tw,kw. (148)

2 exp lymphocytosis/ (8582)

3 exp esophagitis/ (33387)

4 2 and 3 (67)

5 1 or 4 (196)

Database: Ovid MEDLINE(R) Epub Ahead of Print, In-Process & Other Non-Indexed Citations and Ovid MEDLINE(R) <1946 to Present>

Search Strategy:

--------------------------------------------------------------------------------

1 (Lymphocyt* adj2 (esophag* or oesophag*)).tw,kf. (89)

2 Lymphocytosis/ (2710)

3 exp Esophagitis/ (11129)

4 2 and 3 (10)

5 1 or 4 (89)

Scopus (127 results)

TITLE-ABS-KEY ( ( lymphocyt* W/2 ( esophag* OR oesophag* ) ) )

**Electronic Supplement 2.** Demographic, clinical and endoscopic characteristics of patients with LyE in studies included for secondary data extraction (*n*=20).

| **First Author,**  **Year** | **Demographic Characteristics** | | | | **Clinical Characteristics** | | | **Endoscopic Characteristics** | | **Comment** |
| --- | --- | --- | --- | --- | --- | --- | --- | --- | --- | --- |
| **Total patients with biopsy, *n*** | **Total patients with only LyE, *n* (%)** | **Female patients with only LyE, *n* (%)** | **Mean age of patients with LyE, alone yrs SD/ Range** | **Most frequent clinical presentation among patients with only LyE, *n* (%)** | **Most frequent clinical association among patients with only LyE, *n* (%)** | **Patients with GERD/ heartburn among patients with only LyE, *n* (%)** | **Patients with only LyE that had normal endoscopy findings, *n* (%)** | **Most frequent endoscopic abnormal finding among patients with only LyE, with description, *n* (%) [if applicable]** |
| Rubio, 2006 (1) | 81 | 20 (24.7) | 10 (50) | 31.3 (Range: 2-82) | GERD: 4 (20) | CD: 8 (40) (see Comment) | 4 (20.0) | 8 (40.0) | Gastroduodenitis: 6 (30) | 7/8 (87.5%) patients with CD and LyE were age <18 |
| Purdy, 2008 (14) | 76 | 42 (55.3) | NS | 44 (Range: 2-81) | Dysphagia: 18 (42.9) | Allergies, non-drug: 14 (33.3) | 11 (26.2) | 13 (30.9) | Esophagitis: 10 (23.8) | GERD occurred less frequently in severe LyE compared to controls |
| Basseri 2010 (15) | 78 | 2 (2.6) | 2 (100) | 47.5 (SD:9.2) | Dysphagia/odynophagia/ abdominal pain/ bloating/ globus sensation: 1 (50) | RE: 2 (100) | 2 (100) | 0 (0) | Hiatal hernia: 2 (100) | NA |
| Ebach 2011 (16) | 128 | 20 (15.6) | NS (see Comment 1) | NS | NS | CD: 17 (85.0) (see Comment 2) | NS | NS | NS | 1, Authors pooled data for emographic, clinical and endoscopic characteristics for patients with both LyE and CD; 2, there was a significant association with CD and LyE (P=0.0002) |
| Haque 2012 (see Comment 1) (2) | 129 252 | 119 (0.1) (see Comment 2) | 72 (60.5) | Median: 63 (NS) | Dysphagia 63 (52.9) | Clinically suspected EoE: 37 (31.1) | 22 (18.5) (see Comment 3) | 27 (22.7) | Endoscopically suspected EoE: 40 (33.5) | 1, Phase 1 was a study used to determine diagnostic criteria, while Phase II was used to collect data; 2, Estimate of prevalence among adults; 3. GERD significantly associated with normal esophagus compared to patients with LyE (OR 0.54, 95% CI 0.34-0.85) |
| Cohen 2012 (17) | 81 | 81 (100) | 44 (54.3) | Median: 51 (Range:19-84) | Dysphagia: 54 (66.7) | GERD: 40 (49.4) | 40 (49.4) | 24 (29.6) | Rings: 16 (19.8) | NA |
| Basseri 2013 (20) | 47 | 1 (2.1) | 0 (0) | 20 (NA) | NS | CD: 1 (100) | NS (see Comment) | 0 (0) | Esophagitis: 1 (100) | NA |
| Tanaka 2013 (21) | 31 | 11 (35.4) | NS | Median: 39 (Range:26-32) | NS | NS | NS (see Comment 1) | NS | Mucosal rings/ Linear furrows: 6 (54.5) (see Comment 2) | 1, Patients with GERD acted as controls; 2, on NBI-ME, patients with GERD had significantly more abnormal findings than patients with EoE/ EEo and LyE (P<0.001) |
| Sutton 2014 (23) | 545 | 31 (5.7) (see Comment 1 ) | 15 (48.4) | 9.0 (SD:4.5) | Vomiting: 17 (54.8) | CD: 6 (19.4) (see Comment 2) | 4 (12.9) | 24 (77.4) | White plaques: 3 (9.7) | 1. Estimate of prevalence among pediatric population  2. LyE was significantly associated with CD in pediatric population (p<0.05) |
| Xue 2015 (25) | 73 | 45 (61.6) (see Comment) | 29 (64.4) | 62.2 (SD:12.5) | Dysphagia: 28 (62.2) | Motility abnormalities: 16 (76.2) | 13 (28.9) | 15 (33.3) | Hiatus hernia and/or Schatzki ring: 17 (37.8) | Two subsets of LyE (LE-NG, LE-FG) were identified, and the data is pooled here, where possible |
| Kissiedu 2016 (3) | 102 | 7 (6.8) ; 17 (16.7) (see Comment) | NS | NS | Barrett esophagus: 17 (100) (see Comment 2) | NS (see Comment 3) | NS | NS | NS | 1, Represents patients with LyE pre-ablation and  post-ablation, respectively; 2, Barrett’s esophagus was inclusion criteria; 3, independent risk factors for development of post-ablation LyE were cryotherapy, smoking and hyperlipidemia (P<0.05) |
| Putra 2016 (26) | 139 | 26 (18.7) | NS (see Comment) | NS | NS | PEMD: 22 (84.6) | 4 (5.7) | NS | NS | Did not provide demographic, clinical or endoscopic data for patients with LyE alone |
| Pasricha 2016 (27) | 87 | 27 (31.0) | 17 (63.0) | 56 (SD:16) | Dysphagia: 19 (70.4) | Smoking: 17 (63.0%) (see Comment) | 14 (51.9) | 4 (14.8) | Narrow calibre: 12 (44.4) | Smoking was significantly associacted with LyE (P=0.02) |
| Truskaite 2016 (28) | 185 | 16 (8.6) (see Comment 1) | 6 (37.5) | Median: 63 R(Range:40-89) | Food bolus impaction: 16 (100) | NS | 0 (0) (See Comment 2) | NS | NS | 1, Estimate of prevalece of LyE among adults patients with food bolus impaction; 2, GERD was found in 5 patients with lymphocytic infiltration |
| Rubio 2016 (29) | 7 | 4 (57.1) | NS | NS | NS | NS | NS | NS | NS (see Comment) | Analysis using TEM identified ultrastrucutral differences between patients with LyE and GERD |
| Gonzalez-Cordero 2016 (30) | 972 | 2 (0.2) (see Comment) | 0 (0) | 57.5 (SD:7.8) | Heartburn / dysphagia/ food impaction: 1 (50) | NS | 2 (100) | 2 (100) | NA | Estimate of prevalence of LyE among adult patients with dysphagia/food bolus impaction |
| Jideh 2016 (31) | 3 | 3 (100) | 2 (66.6) | 65 (SD: 17.8) | Dysphagia: 3 (100) | NA | 1 (33.3) | 1 (33.3) | Hiatal hernia/ linear furrows/ stricture: 1 (33.3) | NA |
| Pleet 2017 (5) | 3 | 3 (100) | 1 (33.3) | 67 (SD: 14) | Dysphagia: 2 (66.6) | NA | NS | 0 (100) | Rings: 3 (100) | NA |
| Rubio 2017 (36) | 311 | 88 (28.3) | 33 (40.6) | NS (see Comment 1) | NS (see Comment 2) | NS | NS | NS | NS | 1, ages presented in ranges; 2, Pooled data for patients with both LyE and EoE |
| Ichiya 2017 (37) | 137 | 26 (19.0) | NS (see Comment 1) | NS | NS | NS | NS (see Comment 2) | NS | NS | 1, Pooled the data for patients with both LyE and EoE; 2, significant difference on NBI-ME between patients with GERD (i.e. control group) and patients with LyE or EoE (P<0.001) |

CD, Crohn’s Disease; EEo, esophageal eosinophilia; EoE, eosinophilic esophagitis; Lymphocytic esophagitis; NA, not applicable; NBi-ME, narrow-band imaging magnifying endoscopy; NS, not specified; PEMD, primary esophageal motility disorders; RE, reflux esophagitis; SD, standard deviation; TEM, transmission electron microscope

**Electronic Supplement 3.** Diagnostic criteria and methods of LyE in studies included for primary data extraction (*n*=31).

| **First author and Year, Study Type** | **Diagnostic Criteria** | | | | **Diagnostic methods** | | | **Comment** |
| --- | --- | --- | --- | --- | --- | --- | --- | --- |
| **Diagnostic Cut-Off (IEL/hpf), with IEL type [if applicable]** | **Peri-papillary IELs specified** | **Spongiosis specified** | **Absence of granulocytes specified, with cut-off [if applicable]** | **Biopsy protocol reported, with esophageal location(s) [if applicable]** | **Microscopic protocol reported, with area per hpf (mm2) [if applicable]** | **Histologic/ immunologic staining reported, with stains [if applicable]** |
| Rubio 2006 (1), Cross sectional | NS | Yes (see Comment) | No | Yes | No | Yes; 0.0729 | Yes; H/E, Giemsa; CD3; CD8; CD15; TIA 1, granzyme B (see Comment) | IELs mostly found in peripapillary fields, although also in interpapillary fields;  CD15 used to stain granulocytes |
| Purdy 2008 (14) , Cross sectional | NS | Yes (see Comment) | No | Yes | Yes; proximal, middle distal | Yes; (area not defined) | No | Defined “severe LyE” (IELs in the interpapillary and peripapillary fields) and “mild LyE” (IELs in peripapllary fields only) as separate entities |
| Basseri 2010 (15), Cross sectional | ≥50 | Yes | No | Yes (see Comment) | No | Yes; 0.22 | Yes; H/E | Acknowledged difficulty in differentiating degranulated eosinophils from lymphocytes morphologically |
| Ebach 2011 (16), Cross sectional | >50 | No | No | Yes; >50:1 IEL to IEG | Yes; Upper and lower | Yes (see Comment) | No | Indicated that highest density of IELs /hpf were counted; no other microscopic specifications given |
| Haque 2012 (2), Cross sectional (see Comment) | NS | Yes | Yes | Yes | No | Yes; 0.237 | Yes; CD3, CD8, CD20 | Two-phase study: phase 1 was to establish diagnostic criteria |
| Cohen 2012 (17), Cohort | >20 | No | No | Yes | No | No | No | NA |
| Kasirye 2012 (18), Case report | NS | Yes | No | Yes | Yes; proximal, distal esophagus | No | No | NA |
| Mandaliya 2012 (19), Case report | NS | Yes | No | Yes | Yes; middle third | No | Yes; H/E, CD3, CD5, CD20 | NA |
| Basseri 2013 (20), Cross sectional | ≥50 (see Comment) | Yes | No | Yes | Yes; middle, distal | Yes; 0.22 | Yes; H/E | Defined “peripapillary lymphocytosis” ( ≥50 IELS and significant granulocytes) as a separate entity from LyE |
| Tanaka 2013 (21), Cross sectional | >20 | No | No | Yes | No | No | Yes; CD15(see Comment) | Stained granulocytes with CD15 |
| Hendy 2013 (22), Case report | NS | Yes | No | Yes | Yes; middle, distal | No | No | NA |
| Sutton 2014 (23), Cross sectional | >50 | No | No | Yes; <1 :50 granulocyte per IELs | No | Yes; 0.237 (see Comment) | Yes; H/E | IELs counted in most densely populated hpf |
| Figueiredo 2014 (24), Case report | NS | Yes | No | Yes | Yes; upper, lower thirds | No | Yes; H/E, CD8 | NA |
| Xue 2015 (25), Cross sectional | NS | No | No | Yes; (see Comment) | No | Yes; 0.237 | Yes; H/E, CD4, CD8 | Defined “LyE-NG” (IELS with no granulocytes) and “LyE-FG” (IELs with ≤12 in granulocytes total biopsy) as separate entities |
| Kissiedu 2016 (3),  Cohort | ≥20 | Yes | Yes | Yes | No | No | Yes; H/E | NA |
| Putra 2016 (26), Cross sectional | > 62,46,41 (see Comment) | No | No | Yes; ≤1 per 2 hpfs | Yes; (see Comment) | Yes; 0.237 | Yes; H/E;CD4, CD8 | IEL cut-offs taken as mean± 2SD at 0-2, 5, and 10 cm above the GEJ junction, respectively |
| Pasricha 2016 (27),  Cross sectional | ≥10 | No | No | Yes; 0 IEGs | No | Yes; 0.24 | No | NA |
| Truskaite 2016 (28),  Cross sectional | ≥40; (see Comment) | No | No | Yes; ≤14 eos per hpf | Yes; proximal, middle, distal | No | Yes; CD3, CD15 | Defined “compound LyE/EoE” and “lymphocytic infiltration” (20-40 IELs per hpf) as separate entities |
| Rubio 2016 (29), Cross sectional | ≥40; CD3+ | No | No | No | No | Yes; 0.180 | Yes; H/E; CD3 | NA |
| Gonzalez-Cordero 2016 (30), Case series | >20 | No | No | Yes | No | No | No | NA |
| Jideh 2016 (31), Case series | NS | Yes | Yes | Yes | Yes; middle, lower (see Comment) | No | No | Biopsy locations varied among patients included in case series |
| Zhang 2016 (32), Case report | NS | Yes | No | Yes | Yes; middle, distal | No | Yes; CD3, CD5, CD4, CD8, CD20, CD1a | NA |
| Vangimalla 2016 (33), Case report | NS | Yes | Yes | Yes; 0 eos | No | No | No | NA |
| Sloan 2016 (34), Case report | >20 | No | No | Yes | Yes; proximal, middle, distal | No | Yes; CD3, CD4, CD5, CD8 | NA |
| Niewiarowski 2016 (4), Case report | NS | Yes | Yes | Yes | No | No | No | NA |
| Maejima 2016 (35),  Case report | NS | Yes | No | Yes | Yes; proximal, middle, distal | No | Yes; CD3, CD4, CD8, CD20 | NA |
| Havre 2016 (38), Case report | NS | Yes | No | Yes | Yes; proximal, distal | No | Yes, CD3, CD4, CD8 | NA |
| Pleet 2017 (5), Case series | NS | Yes | Yes | Yes | Yes, middle, distal (See comment) | No | No | Biopsy location provided only for one patient |
| Rubio 2017 (36), Cohort | ≥40; CD3+ (see Comment) | No | No | Yes; ≤14 eos per hpf | Yes; proximal, middle, distal | Yes; 0.180 | Yes; H/E, CD3, CD4, CD8, βF1, CD45RO, granzyme B, TIA1, Ki67 | Defined “compound LyE/EoE” and “lymphocytic infiltration” (≤39 IELs/hpf) as separate entities |
| Ichiya 2017 (37), Cohort | ≥40; CD3+ | No | No | Yes; ≤14 eos per hpf | Yes; proximal, middle, distal | No | Yes; CD3 | NA |
| Paparoupa 2017 (39), Case report | >100; CD3+ | Yes | No | Yes; ≤15 granulocytes per hpf | No | No | Yes; CD3, CD15(see Comment) | Stained granulocytes with CD15 |

EoE, eosinophilic esophagitis; H/E, hematoxylin and eosin; LyE, Lymphocytic esophagitis; IELs, intraepithelial lymphocytes; IEGs, intraepithelial granulocytes; hpf, high-power field; GEJ, gastroesophageal junction; eos, eosinophils; NA, not applicable; NS, not specified; SD, standard deviation

**Electronic Supplement 4.** Diagnostic criteria and methods of LyE in abstracts included for primary data extraction (*n*=36).

| **First Author, Year** | **Diagnostic Criteria** | | | | **Diagnostic methods** | | | **Comment** |
| --- | --- | --- | --- | --- | --- | --- | --- | --- |
| **Diagnostic Cut-Off (IEL/hpf), with IEL type [if applicable]** | **Peri-papillary IELs specified** | **Spongiosis specified** | **Absence of granulocytes specified, with cut-off [if applicable]** | **Biopsy protocol reported, with esophageal location(s) [if applicable]** | **Microscopic protocol reported, with area per hpf (mm2) [if applicable]** | **Histologic/ immunologic staining reported, with stains [if applicable]** |
| Basseri, 2009 (73) | >50 | Yes | No | Yes | NA | NA | NA | NA |
| Ebach, 2009 (74) | >50 | No | No | Yes; <1:50 IELs | NA | NA | NA | NA |
| Saxena, 2010 (70) | NS | No | No | No | NA | NA | NA | NA |
| Haque, 2010 (72) | >30 | No | Yes | No | NA | NA | Yes; CD3 | NA |
| Walker, 2010 (71) | NS | Yes | No | No | NA | NA | NA | NA |
| Basseri, 2011 (69) | >50 | Yes | No | Yes | NA | NA | NA | NA |
| Veits, 2012 (68) | >50 | No | No | No | NA | NA | NA | NA |
| Che, 2013 (66) | NS | Yes | Yes | Yes | Yes, middle | NA | Yes; CD3 | NA |
| Nieves, 2013 (67) | NS | Yes | No | Yes | Yes, proximal | NA | NA | NA |
| Xue, 2013 (63) | NS | No | No | Yes; ≤1 | NA | NA | Yes; CD4, CD8 | Included absence of other features of esophagitis in the definition |
| Golden, 2013 (64) | >11 | Yes | Yes | Yes | NA | NA | NA | “Low-grade LyE” defined as 11-30 IELs/ hpf, “high-grade LyE” defined as >30 IELs/ hpf |
| Mrak, 2013 (65) | NS | Yes | No | No | NA | NA | NA | NA |
| Pasricha, 2013 (61) | ≥ 10 | No | No | Yes, 0 | NA | Yes; 0.24 | NA | NA |
| Veits, 2013 (62) | >50 | No | No | No | NA | NA | Yes; CD3, CD4, CD8 | NA |
| Reddy, 2014 (56) | NS | Yes | No | Yes | NA | NA | NA | NA |
| Ichiya, 2014 (53) | NS | No | No | No | Yes; proximal, middle, distal | NA | NA | NA |
| Varma, 2014 (54) | NS | No | Yes | No | Yes; middle | NA | NA | NA |
| Kissiedu, 2014a (57) | NS | Yes | Yes | Yes <15 eos | NA | NA | NA | NA |
| Martinez, 2014 (55) | NS | Yes | Yes | Yes | NA | NA | NA | NA |
| Kissiedu, 2014b (59) | NS | Yes | Yes | Yes <15 eos | NA | NA | NA | NA |
| Conner, 2014 (60) | ≥ 12 (see Comment) | Yes | Yes | Yes | NA | NA | NA | “Low-grade LyE” defined as 12-29 IELs/ hpf, and “high-grade LyE” defined as ≥ 30 IELs/ hpf |
| Dunbar, 2014 (58) | NS | Yes | Yes | Yes | NA | NA | NA | NA |
| Rubio, 2014 (75) | ≥ 40 (see Comment) | No | No | Yes; ≤14 | NA | Yes, 0.18 | Yes, CD3, H/E | “Lymphocytic infiltration” defined as ≤ 39 IELs |
| Alsamman, 2015 (48) | NS | Yes | No | Yes | NA | NA | NA | NA |
| Islam, 2015 (49) | NS | Yes | No | Yes | NA | NA | Yes; CD3 | NA |
| Putra, 2015 (51) | 42, 48, 62 (see comment) | Yes | No | Yes | NA | NA | Yes; CD4, CD8 | 42-mid, 48-distal, 62-GEJ |
| Desimone, 2015 (52) | NS | No | No | Yes | NA | NA | Yes; CD8, CD4, CD3, CD20, CD1a, S100 | NA |
| Parekh, 2015 (47) | NS | No | No | Yes | NA | NA | NA | NA |
| Adamcewiez, 2015 (50) | >30 (see comment) | Yes | Yes | Yes | Yes; mid and distal | NA | NA | “Mild LyE” defined as 30-150 IELs/ hpf, “moderate LyE” defined as 150-250 IELs/ hpf, and “severe LyE” defined as >250 IELs/hpf |
| Avila, 2016a (42) | NS | No | No | No | NA | NA | NA | Overlap EoE/LyE |
| Romana, 2016 (44) | NS | No | No | Yes | Yes; distal and proximal | NA | NA | NA |
| Olson, 2016 (46) | NS | No | No | Yes | NA | NA | Yes; CD4, CD8 | NA |
| Avila, 2016b (43) | NS | Yes | No | No | NA | NA | NA | Presence of esophageal symptoms in definition |
| Genta, 2016 (45) | NS | Yes | Yes | Yes | NA | NA | NA | NA |
| Avila, 2017 (40) | >20 | No | No | No | NA | NA | NA | Presence of esophageal symptoms in definition |
| Al-Mazroui, 2017 (41) | ≥ 10 | No | No | Yes | NA | NA | NA | NA |

EoE, eosinophilic esophagitis; LyE, Lymphocytic esophagitis; IELs, intraepithelial lymphocytes; hpf, high-power field; GEJ, gastroesophageal junction; NA, not applicable; NS, not specified; SD, standard deviation; Eos, eosinophils, H/E hematoxylin and eosin

**Electronic Supplement 5.** Quality assessment of cross-sectional and cohort studies of LyE studies using the Newcastle-Ottawa Scale.

| **Newcastle-Ottawa Scale for Cohort studies** | | | | | | | | | |  |
| --- | --- | --- | --- | --- | --- | --- | --- | --- | --- | --- |
| **First author and Year** | **Selection** | | | | **Comparability** | **Outcome** | | | | **Overall rating** |
| **Representativeness of the exposed cohort** | **Selection of non-exposed cohort** | **Ascertainment of exposure** | **Outcome of interest not present at start of study** | **Based on design and analysis** | **Assessment of outcome** | **Long enough follow-up** | | **Adequacy of follow-up** |
| Cohen 2012 (17) | + |  | + |  |  |  | + | |  | Poor |
| Kissiedu 2016 (3) | + |  | + |  | + | + | + | | + | Fair |
| Rubio 2017 (36) | + | + | + |  |  | + |  | |  | Poor |
| Ichiya 2017 (37) | + | + | + |  |  | + |  | |  | Poor |
| **Newcastle-Ottawa Scale for Cross-sectional studies** | | | | | | | | | |  |
| **First author and Year, Study Type** | **Selection** | | | | **Comparability** | **Outcome** | | | | **Overall rating** |
| **Representativeness** | **Sample size** | **Non-respondents** | **Ascertainment of exposure** | **Based on design and analysis** | **Assessment of outcome** | | **Statistical test** | |
| Rubio 2006 (1) | + |  |  |  |  | ++ | | + | | Poor |
| Purdy 2008 (14) | + |  |  |  |  | ++ | | + | | Poor |
| Basseri 2010 (15) | + |  |  |  |  | ++ | | + | | Poor |
| Ebach 2011 (16) | + |  |  |  |  | ++ | | + | | Poor |
| Haque 2012 (2) | + | + |  |  |  | ++ | | + | | Poor |
| Basseri 2013 (20) | + |  |  |  |  | ++ | | + | | Poor |
| Tanaka 2013 (21) | + |  |  |  |  | ++ | |  | | Poor |
| Sutton 2014 (23) | + | + |  |  |  | ++ | | + | | Poor |
| Xue 2015 (25) | + |  |  |  |  | ++ | | + | | Poor |
| Putra 2016 (26) | + |  |  |  | ++ | ++ | | + | | Poor |
| Pasricha 2016 (27) | + |  |  |  |  | ++ | | + | | Poor |
| Truskaite 2016 (28) | + |  |  |  |  | ++ | | + | | Poor |
| Rubio 2016 (29) |  |  |  |  |  | ++ | |  | | Poor |
